# Supplementary material for: Cues to Lying May be Deceptive: Speaker and Listener Behaviour in an Interactive Game of Deception
Source: PubMed Central journal article supplement (PMC6634475; doi:10.5334/joc.46), 2018-09-27
Supplement: joc-1-1-46-s1.pdf [file joc-1-1-46-s1.pdf]

## Appendix A

## AICc and Evidence Ratio formulae

Formulae used to derive AICc weights and evidence ratios of models, and cumulative AICc weights of model parameters:

$$\text{AICc weight: } w_i = \frac{\exp(-\frac{1}{2}\Delta\text{AICc}_i)}{\sum_{j=1}^J \exp(-\frac{1}{2}\Delta\text{AICc}_j)}$$

$$\text{Evidence ratio: } ER_i = \frac{w_{best}}{w_i}$$

5 Cumulative AICc weight of parameter  $p$ :  $\sum w_i = \sum_{i=1}^P w_i$ ,

where  $i$  denotes the current model,  $J$  is number of models in the candidate set,  $w_{best}$  is the AICc weight of the best model, and  $P$  is the number of candidate models in the subset of models containing parameter  $p$ .
