# Supplementary material for: Cues to Lying May be Deceptive: Speaker and Listener Behaviour in an Interactive Game of Deception
Source: PubMed Central journal article supplement (PMC6634475; doi:10.5334/joc.46), 2018-09-27
Supplement: joc-1-1-46-s2.pdf [file joc-1-1-46-s2.pdf]

## Appendix B

## Details of Models

*Summary of AICc results for models exploring the effect of speech variables on predicting Speaker veracity. Models are ranked according to differences in Akaike's Information Criterion corrected for small sample sizes (AICc).*

| Model <sup>a</sup>                            | AICc    | $\Delta$ AICc | $w_i$ <sup>b</sup> | $ER_i$ <sup>c</sup> |
|-----------------------------------------------|---------|---------------|--------------------|---------------------|
| $y \sim ps + \varepsilon$                     | 1583.04 | 0.00          | 0.108              | 1.00                |
| $y \sim ps + pl + \varepsilon$                | 1583.73 | 0.70          | 0.076              | 1.42                |
| $y \sim ps + rp + \varepsilon$                | 1583.91 | 0.88          | 0.070              | 1.55                |
| $y \sim pl + sr + \varepsilon$                | 1584.38 | 1.34          | 0.055              | 1.95                |
| $y \sim sr + \varepsilon$                     | 1584.39 | 1.36          | 0.055              | 1.97                |
| $y \sim ps + rp + pl + \varepsilon$           | 1584.74 | 1.71          | 0.046              | 2.35                |
| $y \sim ps + pl + sr + \varepsilon$           | 1584.75 | 1.71          | 0.046              | 2.35                |
| $y \sim ps + sr + \varepsilon$                | 1584.82 | 1.78          | 0.044              | 2.44                |
| $y \sim ps + rr + \varepsilon$                | 1585.02 | 1.99          | 0.040              | 2.70                |
| $y \sim l + \varepsilon$                      | 1585.04 | 2.00          | 0.040              | 2.72                |
| $y \sim rp + \varepsilon$                     | 1585.05 | 2.01          | 0.040              | 2.73                |
| $y \sim rp + sr + \varepsilon$                | 1585.30 | 2.26          | 0.035              | 3.09                |
| $y \sim rp + pl + sr + \varepsilon$           | 1585.64 | 2.60          | 0.030              | 3.69                |
| $y \sim ps + rr + pl + \varepsilon$           | 1585.73 | 2.70          | 0.028              | 3.85                |
| $y \sim ps + rp + sr + \varepsilon$           | 1585.84 | 2.80          | 0.027              | 4.06                |
| $y \sim ps + rr + rp + \varepsilon$           | 1585.87 | 2.83          | 0.026              | 4.12                |
| $y \sim ps + rp + pl + sr + \varepsilon$      | 1586.12 | 3.07          | 0.023              | 4.64                |
| $y \sim rr + pl + sr + \varepsilon$           | 1586.32 | 3.28          | 0.021              | 5.16                |
| $y \sim rr + sr + \varepsilon$                | 1586.36 | 3.32          | 0.021              | 5.26                |
| $y \sim ps + rr + pl + sr + \varepsilon$      | 1586.68 | 3.64          | 0.018              | 6.18                |
| $y \sim ps + rr + rp + pl + \varepsilon$      | 1586.72 | 3.68          | 0.017              | 6.31                |
| $y \sim ps + rr + sr + \varepsilon$           | 1586.78 | 3.74          | 0.017              | 6.49                |
| $y \sim pl + \varepsilon$                     | 1586.82 | 3.79          | 0.016              | 6.64                |
| $y \sim rp + pl + \varepsilon$                | 1586.83 | 3.80          | 0.016              | 6.67                |
| $y \sim rr + \varepsilon$                     | 1587.04 | 4.01          | 0.015              | 7.41                |
| $y \sim rr + rp + \varepsilon$                | 1587.06 | 4.03          | 0.014              | 7.49                |
| $y \sim rr + rp + sr + \varepsilon$           | 1587.23 | 4.20          | 0.013              | 8.15                |
| $y \sim rr + rp + pl + sr + \varepsilon$      | 1587.55 | 4.52          | 0.011              | 9.57                |
| $y \sim ps + rr + rp + sr + \varepsilon$      | 1587.77 | 4.74          | 0.010              | 10.67               |
| $y \sim ps + rr + rp + pl + sr + \varepsilon$ | 1588.02 | 4.98          | 0.009              | 12.08               |
| $y \sim rr + pl + \varepsilon$                | 1588.82 | 5.79          | 0.006              | 18.06               |
| $y \sim rr + rp + pl + \varepsilon$           | 1588.85 | 5.82          | 0.006              | 18.32               |

<sup>a</sup>  $y$  = Speaker veracity, ps = pauses, rr = repetitions, rp = repairs, pl = prolongations, sr = speech rate,  $\varepsilon$  = error term (random intercepts for subjects and items)

<sup>b</sup> AICc weight (relative likelihood of model based on AICc value)

<sup>c</sup> Evidence ratio (likelihood of favouring the best model over the current model  $i$ )

*Model output for best-supported model for the effect of speech variables on Speaker veracity.*

---

| Model of pauses on Speaker veracity                 |             |          |                |                |
|-----------------------------------------------------|-------------|----------|----------------|----------------|
| <b>Fixed effects</b>                                |             |          |                |                |
|                                                     | Estimate    | SE       | <i>z</i> value | <i>p</i> value |
| (Intercept)                                         | 0.16        | 0.08     | 1.96           | .05            |
| pauses                                              | 0.26        | 0.13     | 2.01           | .04            |
| <b>Random effects</b>                               |             |          |                |                |
|                                                     |             | Variance | SD             |                |
| participants                                        | (Intercept) | 0.05     | 0.23           |                |
| items                                               | (Intercept) | 0.10     | 0.31           |                |
| No. of obs: 1149, groups: participant, 24; item, 96 |             |          |                |                |

---

*Summary of AICc results for models exploring the effect of speech variables on predicting Guesser response. Models are ranked according to differences in Akaike's Information Criterion corrected for small sample sizes (AICc).*

| Model <sup>a</sup>                            | AICc    | $\Delta$ AICc | $w_i^b$ | $ER_i^c$ |
|-----------------------------------------------|---------|---------------|---------|----------|
| $y \sim ps + \varepsilon$                     | 1569.21 | 0.00          | 0.151   | 1.00     |
| $y \sim ps + rp + \varepsilon$                | 1569.47 | 0.26          | 0.132   | 1.14     |
| $y \sim ps + sr + \varepsilon$                | 1570.80 | 1.60          | 0.068   | 2.22     |
| $y \sim ps + pl + \varepsilon$                | 1570.88 | 1.67          | 0.065   | 2.31     |
| $y \sim ps + rr + \varepsilon$                | 1570.92 | 1.71          | 0.064   | 2.35     |
| $y \sim ps + rp + pl + \varepsilon$           | 1571.07 | 1.86          | 0.060   | 2.54     |
| $y \sim ps + rr + rp + \varepsilon$           | 1571.07 | 1.86          | 0.059   | 2.54     |
| $y \sim rr + rp + pl + \varepsilon$           | 1571.33 | 2.12          | 0.052   | 2.89     |
| $y \sim ps + rr + sr + \varepsilon$           | 1572.38 | 3.17          | 0.031   | 4.88     |
| $y \sim sr + \varepsilon$                     | 1572.44 | 3.24          | 0.030   | 5.05     |
| $y \sim ps + rr + pl + \varepsilon$           | 1572.57 | 3.37          | 0.028   | 5.38     |
| $y \sim ps + rr + pl + sr + \varepsilon$      | 1572.64 | 3.43          | 0.027   | 5.57     |
| $y \sim ps + pl + sr + \varepsilon$           | 1572.69 | 3.48          | 0.026   | 5.71     |
| $y \sim rp + sr + \varepsilon$                | 1572.72 | 3.51          | 0.026   | 5.79     |
| $y \sim ps + rp + pl + sr + \varepsilon$      | 1572.84 | 3.63          | 0.025   | 6.15     |
| $y \sim ps + rp + sr + \varepsilon$           | 1573.07 | 3.86          | 0.022   | 6.90     |
| $y \sim rr + sr + \varepsilon$                | 1574.04 | 4.83          | 0.013   | 11.20    |
| $y \sim rp + \varepsilon$                     | 1574.07 | 4.86          | 0.013   | 11.36    |
| $y \sim rp + pl + \varepsilon$                | 1574.18 | 4.97          | 0.013   | 12.03    |
| $y \sim rp + pl + sr + \varepsilon$           | 1574.24 | 5.03          | 0.012   | 12.39    |
| $y \sim ps + rr + rp + sr + \varepsilon$      | 1574.28 | 5.08          | 0.012   | 12.67    |
| $y \sim pl + sr + \varepsilon$                | 1574.30 | 5.10          | 0.012   | 12.80    |
| $y \sim ps + rr + rp + pl + \varepsilon$      | 1574.41 | 5.20          | 0.011   | 13.47    |
| $y \sim ps + rr + rp + pl + sr + \varepsilon$ | 1574.60 | 5.40          | 0.011   | 14.85    |
| $y \sim pl + \varepsilon$                     | 1575.72 | 6.51          | 0.006   | 25.94    |
| $y \sim 1 + \varepsilon$                      | 1575.73 | 6.53          | 0.006   | 26.17    |
| $y \sim rr + rp + sr + \varepsilon$           | 1575.92 | 6.71          | 0.005   | 28.68    |
| $y \sim rr + rp + pl + sr + \varepsilon$      | 1575.95 | 6.75          | 0.005   | 29.19    |
| $y \sim rr + rp + \varepsilon$                | 1575.97 | 6.76          | 0.005   | 29.38    |
| $y \sim rr + pl + sr + \varepsilon$           | 1576.01 | 6.81          | 0.005   | 30.04    |
| $y \sim rr + pl + \varepsilon$                | 1577.67 | 8.46          | 0.002   | 68.82    |
| $y \sim rr + \varepsilon$                     | 1577.72 | 8.52          | 0.002   | 70.71    |

<sup>a</sup>  $y$  = Guesser response, ps = pauses, rr = repetitions, rp = repairs, pl = prolongations, sr = speech rate,  $\varepsilon$  = error term (random intercepts for subjects and items)

<sup>b</sup> AICc weight (relative likelihood of model based on AICc value)

<sup>c</sup> Evidence ratio (likelihood of favouring the best model over the current model  $i$ )

*Model output for best-supported model for the effect of speech variables on Guesser response.*

---

| Model of pauses on Guesser response                 |             |          |                |                |
|-----------------------------------------------------|-------------|----------|----------------|----------------|
| <b>Fixed effects</b>                                |             |          |                |                |
|                                                     | Estimate    | SE       | <i>z</i> value | <i>p</i> value |
| (Intercept)                                         | 0.24        | 0.78     | 3.06           | < .01          |
| pauses                                              | -0.39       | 0.13     | -2.95          | < .01          |
| <b>Random effects</b>                               |             |          |                |                |
|                                                     |             | Variance | SD             |                |
| participants                                        | (Intercept) | 0.06     | 0.24           |                |
| items                                               | (Intercept) | 0.00     | 0.00           |                |
| No. of obs: 1147, groups: participant, 24; item, 96 |             |          |                |                |

---

*Summary of AICc results for models exploring the effect of gesture variables on predicting Speaker veracity. Models are ranked according to differences in Akaike's Information Criterion corrected for small sample sizes (AICc).*

| Model <sup>a</sup>                       | AICc    | $\Delta$ AICc | $w_i$ <sup>b</sup> | $ER_i$ <sup>c</sup> |
|------------------------------------------|---------|---------------|--------------------|---------------------|
| $y \sim ad + \varepsilon$                | 1516.03 | 0.00          | 0.264              | 1.00                |
| $y \sim ad + il + \varepsilon$           | 1517.30 | 1.27          | 0.140              | 1.88                |
| $y \sim ad + ey + \varepsilon$           | 1517.69 | 1.66          | 0.115              | 2.29                |
| $y \sim ad + af + \varepsilon$           | 1517.94 | 1.91          | 0.102              | 2.60                |
| $y \sim ad + il + ey + \varepsilon$      | 1518.68 | 2.64          | 0.070              | 3.75                |
| $y \sim 1 + \varepsilon$                 | 1519.14 | 3.11          | 0.056              | 4.73                |
| $y \sim ad + af + il + \varepsilon$      | 1519.28 | 3.25          | 0.052              | 5.08                |
| $y \sim ad + af + ey + \varepsilon$      | 1519.53 | 3.50          | 0.046              | 5.75                |
| $y \sim il + \varepsilon$                | 1520.30 | 4.27          | 0.031              | 8.47                |
| $y \sim ey + \varepsilon$                | 1520.45 | 4.42          | 0.029              | 9.13                |
| $y \sim ad + af + il + ey + \varepsilon$ | 1520.61 | 4.58          | 0.027              | 9.87                |
| $y \sim af + \varepsilon$                | 1521.15 | 5.12          | 0.020              | 12.91               |
| $y \sim il + ey + \varepsilon$           | 1521.23 | 5.20          | 0.020              | 13.49               |
| $y \sim af + il + \varepsilon$           | 1522.32 | 6.29          | 0.011              | 23.19               |
| $y \sim af + ey + \varepsilon$           | 1522.42 | 6.39          | 0.011              | 24.44               |
| $y \sim af + il + ey + \varepsilon$      | 1523.25 | 7.22          | 0.007              | 36.93               |

<sup>a</sup>  $y$  = Speaker veracity, ad = adaptors, af = affect displays, il = illustrators, ey = eye contact,  $\varepsilon$  = error term (random intercepts for subjects and items)

<sup>b</sup> AICc weight (relative likelihood of model based on AICc value)

<sup>c</sup> Evidence ratio (likelihood of favouring the best model over the current model  $i$ )

*Model output for best-supported model for the effect of gesture variables on Speaker veracity.*

---

| Model of adaptors on Speaker veracity               |             |          |                |                |
|-----------------------------------------------------|-------------|----------|----------------|----------------|
| <b>Fixed effects</b>                                |             |          |                |                |
|                                                     | Estimate    | SE       | <i>z</i> value | <i>p</i> value |
| (Intercept)                                         | 0.18        | 0.08     | 2.11           | .04            |
| adaptors                                            | -0.29       | 0.13     | -2.26          | .02            |
| <b>Random effects</b>                               |             |          |                |                |
|                                                     |             | Variance | SD             |                |
| participants                                        | (Intercept) | 0.08     | 0.28           |                |
| items                                               | (Intercept) | 0.06     | 0.23           |                |
| No. of obs: 1101, groups: participant, 23; item, 96 |             |          |                |                |

---

*Summary of AICc results for models exploring the effect of gesture variables on predicting Guesser response. Models are ranked according to differences in Akaike's Information Criterion corrected for small sample sizes (AICc).*

| Model <sup>a</sup>                       | AICc    | $\Delta$ AICc | $w_i$ <sup>b</sup> | $ER_i$ <sup>c</sup> |
|------------------------------------------|---------|---------------|--------------------|---------------------|
| $y \sim af + \varepsilon$                | 1508.12 | 0.00          | 0.281              | 1.00                |
| $y \sim af + il + \varepsilon$           | 1509.76 | 1.62          | 0.124              | 2.27                |
| $y \sim ad + af + \varepsilon$           | 1510.08 | 1.97          | 0.105              | 2.67                |
| $y \sim af + ey + \varepsilon$           | 1510.08 | 1.97          | 0.105              | 2.67                |
| $y \sim 1 + \varepsilon$                 | 1510.36 | 2.24          | 0.092              | 3.06                |
| $y \sim ad + af + il + \varepsilon$      | 1511.72 | 3.60          | 0.046              | 6.06                |
| $y \sim af + il + ey + \varepsilon$      | 1511.76 | 3.65          | 0.045              | 6.20                |
| $y \sim ad + af + ey + \varepsilon$      | 1512.06 | 3.95          | 0.039              | 7.19                |
| $y \sim il + \varepsilon$                | 1512.24 | 4.12          | 0.036              | 7.87                |
| $y \sim ey + \varepsilon$                | 1512.37 | 4.25          | 0.033              | 8.39                |
| $y \sim ad + \varepsilon$                | 1512.37 | 4.25          | 0.033              | 8.39                |
| $y \sim ad + af + il + ey + \varepsilon$ | 1513.73 | 5.62          | 0.017              | 16.60               |
| $y \sim il + ey + \varepsilon$           | 1514.26 | 6.14          | 0.013              | 21.55               |
| $y \sim ad + il + \varepsilon$           | 1514.26 | 6.14          | 0.013              | 21.57               |
| $y \sim ad + ey + \varepsilon$           | 1514.39 | 6.27          | 0.012              | 23.01               |
| $y \sim ad + il + ey + \varepsilon$      | 1516.28 | 8.16          | 0.005              | 59.21               |

<sup>a</sup>  $y$  = Guesser response, ad = adaptors, af = affect displays, il = illustrators, ey = eye contact,  $\varepsilon$  = error term (random intercepts for subjects and items)

<sup>b</sup> AICc weight (relative likelihood of model based on AICc value)

<sup>c</sup> Evidence ratio (likelihood of favouring the best model over the current model  $i$ )

*Model output for best-supported model for the effect of gesture variables on Guesser response.*

---

Model of affect displays on Guesser response

---

**Fixed effects**

|                 | Estimate | SE   | <i>z</i> value | <i>p</i> value |
|-----------------|----------|------|----------------|----------------|
| (Intercept)     | 0.23     | 0.90 | 2.57           | .01            |
| affect displays | 0.29     | 0.14 | 2.05           | .04            |

**Random effects**

|              |             | Variance | SD     |
|--------------|-------------|----------|--------|
| participants | (Intercept) | < 0.01   | < 0.01 |
| items        | (Intercept) | < 0.01   | < 0.01 |

No. of obs: 1101, groups: participant, 23; item, 96

---
